# Supplementary material for: State updating in the Xin'anjiang Model: Joint assimilating streamflow and multi-source soil moisture data via Asynchronous Ensemble Kalman Filter with enhanced Error Models
Source: Copernicus journal article supplement (doi:10.5194/hess-2024-211), 2024-07-16
Supplement: Supplementary file [file hess-2024-211-AC4-supplement.pdf]

## Point-by-point response to Anonymous Reviewer #1

We would like to sincerely appreciate you for the review of our manuscript “State updating in the Xin'anjiang Model: Joint assimilating streamflow and multi-source soil moisture data via Asynchronous Ensemble Kalman Filter with enhanced Error Models” and the constructive suggestions. We sincerely believe these comments facilitate the quality improvement of this manuscript. All the comments have been considered and a point-by-point response has been provided below.

The point-by-point response is formatted as follows:

- Reviewer’s comments are shown in blue
- Authors’ response are shown in black
- Authors’ changes in the manuscript are shown in red. The line numbers indicated in this response are those in the "Revised Manuscript with no changes marked" document
- The unchanged parts of the manuscript are shown in black

---

This study provides a comprehensive review of hydrological data assimilation for flood simulation (forecasting). It attempts to integrate soil moisture data from various sources and jointly assimilate them with runoff observations into a hydrological model. The uniqueness of this paper lies in its first-time application of the Asynchronous Ensemble Kalman Filter (AEnKF) for such joint assimilation, with a consideration of the temporal correlation of observation errors. The paper is well-structured, rich in content, and the results are presented clearly, which made it an engaging read for me. Overall, it is a well-conducted study. However, there are some areas that could be further improved, such as the insufficient discussion of the AEnKF method in the introduction. Below are some of my comments and suggestions:

**Response:** Thank you very much for your concise paper summary and positive feedback on our research. We are honored that our paper has captured your interest. We have carefully considered all of your comments and responded them in the subsequent specific comments section.

## Specific Comments:

---

1. The Asynchronous Ensemble Kalman Filter (AEnKF) is a simple yet effective data assimilation method, well-suited for state updating in hydrological models. However, the authors have not sufficiently discussed the existing research and applications of the AEnKF method. I recommend that the authors emphasize this discussion more prominently in the Introduction (page 3).

**Response:** Thanks for the helpful suggestion. We have recognized this issue and included a discussion on existing research and applications of the AEnKF method in the Introduction section of the revised manuscript (LINES 77-90).

### **Revised Manuscript LINES 77-90:**

The AEnKF technique was first applied by Krymskaya (2013) to the problem of history matching in reservoir engineering. The study revealed that AEnKF outperforms EnKF in parameter estimation and utilizes the data with similar efficiency. The AEnKF is recognized for its simplicity and high computational efficiency, offering significant potential in short-term flood forecasting applications. Despite its promise, the scope of research in this area is relatively limited. Among the few studies conducted, Mazzoleni et al. (2018) evaluated AEnKF assimilation in simplified flow routing models, highlighting its exceptional performance in both lumped and distributed flow routing. Tao et al. (2016) summarized the hydrological forecasting test conducted during the 2014 IPHEX-IOP campaign, proposing a framework for improving flood prediction in mountainous regions through the assimilation of discharge data using the AEnKF method, with a focus on enhancing forecast accuracy and reducing uncertainty. In addition, Rakovec et al. (2015) and our earlier study (Gong et al., 2024) applied the AEnKF to the distributed HBV-96 model and the Xin'anjiang model, respectively. These studies examined effectiveness of AEnKF in real-time correction through the assimilation of observed discharge in distributed and semi-distributed hydrological models, revealing that AEnKF outperforms the standard EnKF. However, these studies assimilate only a single type of observational data (e.g., observed discharge) using the AEnKF method, which does not take full advantage of the AEnKF.

2. The discussion of the advantages of AEnKF should be included in the introduction rather than in the methodology section (page 5, Lines 160-163).

**Response:** Thanks for the helpful suggestion. We have deleted this section in the revised manuscript (LINES 191-192), as the advantages of AEnKF have already been discussed in the Introduction.

### **Revised Manuscript LINES 191-192:**

The Asynchronous Ensemble Kalman Filter (AEnKF) represents a straightforward enhancement of the Ensemble Kalman Filter (EnKF), utilizing the same assimilation framework as EnKF. ~~Its uniqueness lies in its capability to assimilate multi-temporal observational data, enabling it to effectively incorporate a broader temporal spectrum of observations. This feature is particularly advantageous in capturing the dynamic nature of hydrological processes over time.~~

3. It is very interesting that the study considers the temporal correlation of observation errors and rainfall errors in data assimilation, as most studies assume these errors are independent. Could the authors provide more details on how this was specifically implemented? (page 8, Lines 220-222)

**Response:** Thank you very much for your comment. We addressed the temporal correlation of rainfall and runoff observation errors using a simple first-order autoregressive model. By designing an appropriate first-order autoregressive function, we ensured that the error model, which accounts for temporal correlation, maintains the same mean and standard deviation as the original error model after transformation. Please see S1.1 and S1.2 in the Supplement documentation for the details.

### **Revised Supplement Part S1.1:**

#### **S1.1. Uncertainty in model forcing**

In flood forecasting, the most critical model driving data is rainfall. We used log-normal multiplicative perturbation to characterize rainfall errors (McMillan et al., 2011; DeChant and Moradkhani, 2012; Gong et al., 2023):

$$\mathbf{P}_j^o(t_i) = \boldsymbol{\delta}^P(t_i) \cdot \mathbf{P}(t_i) \quad (\text{S1-1})$$

Where  $\mathbf{P}(t_i) = [P_1(t_i), \dots, P_{N_p}(t_i)]^T \in \mathcal{R}^{N_p}$  is the rainfall observation vector;  $N_p$  is the dimensionality of the rainfall observations;  $\boldsymbol{\delta}^P(t_i)$  is lognormal perturbation matrix. The errors in the precipitation measurement are assumed to be spatially independent, so that,  $\boldsymbol{\delta}^P(t_i)$  is also a diagonal matrix. The diagonal element is  $\delta_n^P(t_i)$ , ( $n = 1, \dots, N_p$ ), and  $\ln \delta_n^P(t_i) \sim N(\mu_{lnp}, \sigma_{lnp})$  follows a lognormal distribution with the mean of 1.0 and standard deviation of  $\sigma_p$ . Additionally, a first-order autoregressive model is employed to represent the temporal correlation in precipitation measurement errors. At each time step, the perturbation is mathematically adjusted as follows:

$$\begin{aligned} \ln \delta_n^p(t_i) = & \mu_{lnp} + \alpha_{lnp} [\ln \delta_n^p(t_{i-1}) - \mu_{lnp}] \\ & + \varphi \sigma_{lnp} (1 - \alpha_{lnp}^2)^{0.5} \end{aligned} \quad (S1-2)$$

Where  $\mu_{lnp} = -0.5\sigma_{lnp}^2$ ;  $\alpha_{lnp}$  is autocorrelation coefficient for precipitation measurement errors.

### **Revised Supplement Part S1.2:**

#### **S1.2. Uncertainty in observations**

The observation error is generalized as functions of the corresponding observed values (Weerts & El Serafy, 2006; Clark et al., 2008; Alvarez-Garreton et al., 2015):

$$\mathbf{y}_j^o(t_i) = [\mathbf{I} + \boldsymbol{\delta}^y(t_i)] \cdot \mathbf{y}(t_i) \quad (S1-3)$$

Where  $\mathbf{y}_j^o(t_i) \in \mathcal{R}^{N_y}$  represents the perturbed observation vector for the jth ensemble.

$\mathbf{I}$  is identity matrix;  $\boldsymbol{\delta}^y(t_i)$  is Gaussian perturbation matrix. Assuming that the observation errors are spatially independent,  $\boldsymbol{\delta}^y(t_i) \in \mathcal{R}^{N_y \times N_y}$  is a diagonal matrix with diagonal elements  $\delta_n^y(t_i), (n = 1, \dots, N_y)$ . When assimilating soil moisture

observations, the diagonal elements follow a normal distribution  $\delta_n^y(t_i) \sim N(0, \sigma_{ys})$ ,

and similarly,  $\delta_n^y(t_i) \sim N(0, \sigma_{yd})$  is used when assimilating discharge observations.

Furthermore, we employ a first-order autoregressive model to account for the temporal correlation in observation errors. At time step  $t$ , the perturbation is adjusted using the formula:

$$\delta_n^y(t_i) = \mu_y + \alpha_y [\delta_n^y(t_{i-1}) - \mu_y] + \varphi \sigma_y (1 - \alpha_y^2)^{0.5} \quad (S1-4)$$

Where  $\mu_y = 0$ ;  $\varphi$  is a standard Gaussian noise;  $\sigma_y$  is the standard deviation, which, as previously stated, takes the values  $\sigma_{ys}$  or  $\sigma_{yd}$ ;  $\alpha_y$  is the autocorrelation coefficient, with values of  $\alpha_{ys}$  when assimilating soil moisture observations, or  $\alpha_{yd}$  when assimilating discharge observations.

4. As far as I know, the Xin'anjiang model is based on the saturation-excess theory, making it suitable only for regions where this runoff generation mechanism dominates, such as humid and semi-humid areas. It is not applicable in regions where infiltration-excess theory is predominant, such as arid and semi-arid areas. Could the authors clarify

whether the method proposed in this study is applicable to arid and semi-arid regions? (page 9, Lines 251-260)

**Response:** Thank you for your discussion of the Xin'anjiang model. We completely agree with your view on its runoff generation mechanism. The Xin'anjiang model is indeed only suitable for humid regions where the saturation-excess runoff mechanism is dominant and is not applicable to arid and semi-arid regions. However, it is important to note that the state updating method proposed in this study is not limited to coupling with the Xin'anjiang model. In fact, this method can be easily coupled with any hydrological model that includes state variables related to soil moisture and channel storage. When coupled with hydrological models suitable for semi-arid and arid regions, it can be effectively applied in those areas. We have discussed this issue in the Discussion section of the revised manuscript (LINES 663-671).

**Revised Manuscript LINES 663-671:**

The Xin'anjiang model is a conceptual hydrological model that generalizes the rainfall-runoff process. Its most prominent feature is performing runoff production calculations based on the saturation-excess runoff mechanism, meaning net rainfall is first entirely used to replenish soil water, and once the soil moisture content in the unsaturated zone reaches field capacity, all subsequent net rainfall is used to generate runoff. Therefore, the Xin'anjiang model is only suitable for humid and semi-humid regions where the saturation-excess runoff mechanism is dominant and is not applicable to arid and semi-arid regions. However, it is important to note that the state updating method proposed in this study is not limited to coupling with the Xin'anjiang model. In fact, this method can be easily coupled with any lumped or semi-distributed hydrological model that includes state variables related to soil moisture and channel storage. When coupled with hydrological models suitable for semi-arid and arid regions, it can be effectively applied in those areas.

5. How are the initial state values for the daily simulation model set? (page 15, Lines 363-364)

**Response:** Thank you for your comment. In this study, the initial values for the daily simulation are set with the soil moisture content at half of the saturation value, and the sub-reaches outflow was set as the observed discharge at the basin outlet on the start date, divided by the total number of sub-reaches. In fact, after an extended period of daily simulation, the initial values of the state variables have a negligible impact on the study, so they can be set to any reasonable value. We have emphasized this point in the revised manuscript (LINES 371-377).

**Revised Manuscript LINES 371-377:**

As long as the warming-up period is adequately long, the influence of initial soil moisture on the simulation at the end of warming-up period, allowing soil moisture for daily simulation to be used as initial conditions for hourly simulation (Yao et al., 2012). The initial values of the daily simulations have a minimal effect on the hourly simulation, so they can be set arbitrarily within reason. In this study, the initial values for the daily simulation are set with the soil moisture content at half of the saturation value, and the sub-reaches outflow is set as the observed discharge at the basin outlet on the start date, divided by the total number of sub-reaches.

6. Why a longer assimilation time window sometimes leads to poorer results. Could the authors provide an explanation for this? (page 17, Lines 427-433)

**Response:** Thank you for your comment. This is primarily because a longer time window includes too much historical information, which may have a weak correlation with the current state variables. Including too much historical observational information in the assimilation system may lead to a degradation in assimilation performance. Tao et al. (2016) (<https://doi.org/10.1016/j.jhydrol.2016.02.019>) tested the performance of the standard AEnKF method with 1-3 hour assimilation time windows and obtained similar results. They found that the 2-hour time window generally yielded better assimilation results than the 3-hour time window, while the 1-hour time window performed the worst. We have discussed this phenomenon in the Discussion section of the revised manuscript (LINES 614-620).

**Revised Manuscript LINES 614-620:**

In the study of assimilation windows for AEnKF in synthetic cases, we found that longer assimilation windows do not necessarily yield better results (Fig. 3). This is primarily because a longer time window includes too much historical information, which may have a weak correlation with the current state variables. Due to the nonlinearity of the hydrological model, where overly long windows can result in the system assimilating excessive noise, which negates the benefits derived from incorporating past observations. Tao et al. (2016) obtained similar results when studying the assimilation window length (1-3 hour) for the assimilation of observed discharge only. They found that the 2-hour time window generally yielded better assimilation results than the 3-hour time window, while the 1-hour time window performed the worst.

7. What does "One-step prediction" refer to? Does it mean a one-hour forecast? Please clarify. (page 18, Line 444)

**Response:** We apologize for any confusion caused by this imprecise description. "One-step prediction" indeed refers to a one-hour forecast, and we have clarified this in the revised manuscript ([LINE 458](#)).

**Revised Manuscript [LINE 458](#):**

One-step (**one-hour**) prediction

8. Why was the lead time set to 8 hours? (page 31, Figure 13)

**Response:** Thank you for your comment. In our real-world cases, we selected an 8-hour lead time primarily due to the limitations of data length. To ensure the consistency of the forecast sequence length and the comparability of results, the forecast start time for different lead times within the same flood event was set to the same point -- specifically, the LT hour after the flood start time (the earliest available hourly data). LT represents the longest lead time in this study. If the longest lead time is set to LT = 8 hours, even for a 1-hour lead time, the forecast begins at the 8th hour after the flood start time. Given the overall short length of available hourly data, in some flood events, the peak occurs as early as the 9th or 10th hour after the forecast begins. If the lead time were set longer than 8 hours, the forecast sequence might not include the flood peak, rendering the results meaningless for flood forecasting. Therefore, in the real-data experiments, we set the maximum lead time to 8 hours. To compensate for the shorter lead time in the real-world cases, we extended the maximum lead time to 24 hours in the synthetic data experiments, which is fully adequate for flood forecasting in medium to small basins covering several thousand square kilometers. We have provided additional explanations in the Experimental Setup section of the revised manuscript for synthetic cases ([LINES 379-383](#)) and real-world cases ([LINES 400-404](#)), respectively.

**Revised Manuscript [LINES 379-383](#):**

In the synthetic cases, the hydrological model operates on an hourly timestep with a maximum lead time of 24 hours, and ensemble simulations involve 100 members. The initial soil moisture is set to half of the maximum value. **To ensure consistency in the length of forecast sequences and the comparability of results, the start time for forecasting the same flood event under different lead times is set at the same moment - specifically, the 24 hours (maximum lead time) after the flood start time.**

**Revised Manuscript [LINES 400-404](#):**

In the real-world cases, the timestep and number of ensemble members are the same as in the synthetic cases. **Similar to the synthetic cases, to ensure the comparability of results, the forecast start time for all lead times is uniformly delayed from the flood**

onset (the earliest available hourly data) by a duration corresponding to the maximum lead time. For some flood events, high flow occurred as early as the 9th hour after onset. To avoid missing the peak flow, the maximum lead time is set to 8 hours.

9. Any limitations of the study should be openly discussed, along with suggestions for future research. (page 32)

**Response:** Thank you for your suggestion. In the revised manuscript, we have included a discussion on the limitations of the methodology used in this study (LINES 662-680).

**Revised Manuscript LINES 662-680:**

### **6.3 Limitations**

The Xin'anjiang model is a conceptual hydrological model that generalizes the rainfall-runoff process. Its most prominent feature is performing runoff production calculations based on the saturation-excess runoff mechanism, meaning net rainfall is first entirely used to replenish soil water, and once the soil moisture content in the unsaturated zone reaches field capacity, all subsequent net rainfall is used to generate runoff. Therefore, the Xin'anjiang model is only suitable for humid and semi-humid regions where the saturation-excess runoff mechanism is dominant and is not applicable to arid and semi-arid regions. However, it is important to note that the state updating method proposed in this study is not limited to coupling with the Xin'anjiang model. In fact, this method can be easily coupled with any lumped or semi-distributed hydrological model that includes state variables related to soil moisture and channel storage. When coupled with hydrological models suitable for semi-arid and arid regions, it can be effectively applied in those areas.

Semi-distributed hydrological models, like the Xin'anjiang model used in this study, have smaller state variable dimensions, allowing for the direct application of the proposed state updating scheme. However, in distributed models where each computational grid (e.g., DEM-based grids) has its own state variables, the state dimension becomes large, making direct application inefficient or prone to spurious correlations from distant observations. To resolve this, we recommend applying covariance localization to AEnKF (Janjić et al., 2011) or other localization techniques (Khaniya et al., 2022). For instance, in covariance localization, a localization radius (RL) is set, and the forecast error covariance matrix is adjusted using a correlation matrix derived from the Schur product theorem. This study focuses on jointly assimilating soil moisture and streamflow using AEnKF, and performing localization on AEnKF is beyond the scope of this research. We will explore this further in future



work.

**Special thanks to you for your good comments. Other revisions to the manuscript can be found in " Point-by-point response to Anonymous Reviewer #2" and " Point-by-point response to Zongping Ren's comments".**

## **Reference mentioned in the responses**

Tao, J., Wu, D., Gourley, J., Zhang, S. Q., Crow, W., Peters-Lidard, C., & Barros, A. P.:  
Operational hydrological forecasting during the IPHEX-IOP campaign - Meet the challenge. *J. Hydrol.*, 541, 434-456, <https://doi.org/10.1016/j.jhydrol.2016.02.019>, 2016.

## Point-by-point response to Anonymous Reviewer #2

We would like to sincerely appreciate you for the review of our manuscript “State updating in the Xin'anjiang Model: Joint assimilating streamflow and multi-source soil moisture data via Asynchronous Ensemble Kalman Filter with enhanced Error Models” and the constructive suggestions. We sincerely believe these comments facilitate the quality improvement of this manuscript. All the comments have been considered and a point-by-point response has been provided below.

The point-by-point response is formatted as follows:

- Reviewer’s comments are shown in blue
- Authors’ response are shown in black
- Authors’ changes in the manuscript are shown in red. The line numbers indicated in this response are those in the "Revised Manuscript with no changes marked" document
- The unchanged parts of the manuscript are shown in black

-----

In the manuscript, joint assimilating streamflow and soil moisture data via Asynchronous Ensemble Kalman Filter with enhanced Error Models was conducted. The modelling results are improved compared with conventional methods. The findings are very helpful for real-time flood forecast. The following points should be further clarified in the revised version.

**Response:** Thank you for your concise summary of the paper and for your positive feedback on our study. We have carefully considered all of your comments and responded them in the subsequent specific comments section.

### Specific Comments:

=====

1. Methods section, I suggest ‘hydrological model’ should be introduced first. Then the readers could understand the model parameters easily in other sections.

**Response:** Thank you for your suggestion. We have adjusted the structure of the Methodology and method section, beginning with an introduction to the hydrological model (LINES 164-189).

## Revised Manuscript LINES 164-189:

### 2 Methodology and method

#### 2.1 Hydrological model

The Xin'anjiang model, conceptualized by Zhao (1992), is a distinguished hydrological model, primarily based on a saturation excess mechanism. Renowned for its straightforward structure and explicit parameter definitions, this model excels in simulating humid catchments, making it a popular tool for flood forecasting in China. To account for spatial variability in rainfall distribution and surface characteristics, the model typically segments a catchment into several sub-basins. These sub-basins act as computational units for runoff generation and routing.

The Xin'anjiang model demands relatively straightforward driving data, and key inputs include the areal mean rainfall depth ( $P$ ) and pan evaporation ( $EM$ ) for each sub-basin. The model typically comprises four main components: evapotranspiration, runoff production, runoff separation, and flow routing, involving the calibration of 16 distinct parameters. The flow chart of the Xin'anjiang model is presented in Fig. 1. Soil evaporation is derived from pan evaporation data using a 'three-layer soil moisture module'. The runoff generation is based on a saturation-excess mechanism, where runoff is produced only when the soil moisture in the unsaturated zone reaches field capacity. The 'lag and route' method calculates the outflow from each sub-basin. Flow routing from the sub-basin outlets to the total basin outlet employs the Muskingum method to successive sub-reaches. It is implemented through dividing the channel from each sub-basin outlet to the total basin outlet into varying numbers of sub-reaches. These sub-reaches are based on the distance from each sub-basin outlet to the total basin outlet. In addition, the basin inflow is directly calculated to the outlet by the Muskingum method.

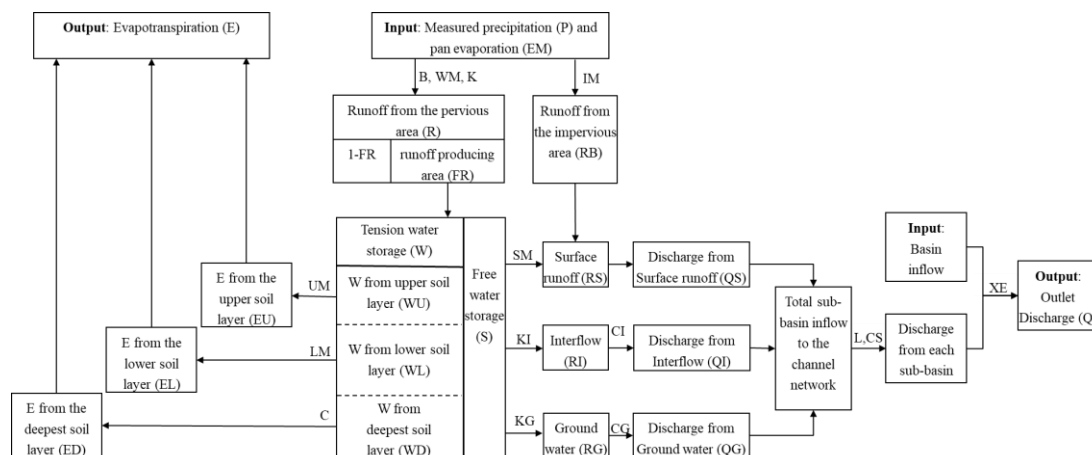

**Fig. 1. Flow Chart of Xin'anjiang Model. The variables in the boxes indicate the model state, inputs and outputs, and the symbols outside the corresponding blocks are model parameters.**

Zhao (1992) categorized the parameters of Xin'anjiang model into sensitive and non-sensitive groups. In real-world cases, non-sensitive parameters are assigned values based on expert judgment, while optimal values for sensitive parameters are derived from historical data using the Shuffled Complex Evolution (SCE-UA) method (Duan et al., 1992). For synthetic cases, however, parameters are taken as recommend defaults. Table 1 summarizes these parameters.

**Table 1. Parameters of the Xin'anjiang model**

| Parameter <sup>a</sup> | Description                                                    | Synthetic cases | Real-world cases |
|------------------------|----------------------------------------------------------------|-----------------|------------------|
| <b><u>K</u></b>        | the ratio of potential evapotranspiration to pan evaporation   | 1.00            | 0.95             |
| <i>C</i>               | Evapotranspiration coefficient of deeper layer                 | 0.13            | 0.05             |
| <i>WUM</i>             | Averaged tension water capacity of upper layer (mm)            | 12.5            | 19.9             |
| <i>WLM</i>             | Averaged tension water capacity of lower layer (mm)            | 75.0            | 64.4             |
| <i>B</i>               | Exponent of the tension water capacity curve                   | 0.40            | 0.38             |
| <i>WM</i>              | Averaged tension water capacity (mm)                           | 125.0           | 119.8            |
| <i>IM</i>              | Percentage of impervious areas in the catchment                | 0.01            | 0.03             |
| <b><u>SM</u></b>       | Averaged free water storage capacity (mm)                      | 30.0            | 16.7             |
| <i>EX</i>              | Exponent of the free water capacity curve                      | 1.25            | 1.50             |
| <b><u>KI</u></b>       | Daily outflow coefficient of free water storage to interflow   | 0.35            | 0.02             |
| <b><u>KG</u></b>       | Daily outflow coefficient of free water storage to groundwater | 0.35            | 0.68             |
| <i>CI</i>              | Daily recession constant of the interflow storage              | 0.70            | 0.52             |
| <b><u>CG</u></b>       | Daily recession constant of the groundwater storage            | 0.99            | 0.93             |
| <b><u>CS</u></b>       | Daily recession constants of channel network storage           | 0.50            | 0.88             |
| <b><u>LAG</u></b>      | Lag in time (h)                                                | 0               | 1                |
| <i>XE</i>              | Parameters of the Muskingum method                             | 0.25            | 0.01             |

<sup>a</sup> Parameters in bold and underline text indicate sensitive parameters.

2. Figure 2(b), there are 3 discharge stations, namely Hexi, Gaochetou, and Wuqiangxibashang. But it is hard to see the controlled drainage area for these 3 stations. Although the rainfall station, soil moisture monitoring sites are can be seen, it should be described in the main text.

**Response:** We apologize for the misunderstanding caused by the unclear image description. To clarify, of the three hydrological stations, Wuqiangxibashang provides outflow data at the basin outlet, while Hexi and Gaochetou provide inflow data to the basin. However, due to the lack of soil moisture and rainfall data within their control areas, the control areas of Hexi and Gaochetou station were not included in this study. We have emphasized this point in the “Study areas and data” section of the revised manuscript (LINES 356-359).

**Revised Manuscript LINES 356-359:**

Among the three discharge stations in the study catchment, Wuqiangxibashang provides the outflow data at the outlet, while Hexi and Gaochetou are stations that provide inflow data for the study area. Due to the lack of soil moisture and rainfall data within their controlled areas, the control areas of Hexi and Gaochetou are not included in the study. For an overview of the data used in this study, please see Supplement 4.

3. In the study region, is there any hydraulic infrastructure to affect runoff generation?

**Response:** Thank you for your comment. The study area is a natural watershed, and the only nearby large reservoir is located downstream of the Wuqiangxibashang station. As a result, it does not significantly impact the forecast results for the study area.

4. Line 389, ‘the maximum lead time is set to 8 hours to avoid missing peak flows’. I cannot understand the linkage between lead time and peak flows.

**Response:** Thank you for your comment. This issue was also addressed in our response to Anonymous Reviewer #1. In our real-world cases, we selected an 8-hour lead time primarily due to the limitations of data length. To ensure the consistency of the forecast sequence length and the comparability of results, the forecast start time for different lead times within the same flood event was set to the same point -- specifically, the LT hour after the flood start time (the earliest available hourly data). LT represents the longest lead time in this study. If the longest lead time is set to  $LT = 8$  hours, even for a 1-hour lead time, the forecast begins at the 8th hour after the flood start time. Given the overall short length of available hourly data, in some flood events, the peak occurs as early as the 9th or 10th hour after the forecast begins. If the lead time were set longer than 8 hours, the forecast sequence might not include the flood peak, rendering the results meaningless for flood forecasting. Therefore, in the real-data experiments, we set the maximum lead time to 8 hours. To compensate for the shorter lead time in the real-world cases, we extended the maximum lead time to 24 hours in the synthetic data experiments, which is fully adequate for flood forecasting in medium to small basins covering several thousand square kilometers. We have provided additional explanations in the Experimental Setup section of the revised manuscript for synthetic cases (LINES 379-383) and real-world cases (LINES 400-404), respectively.

**Revised Manuscript LINES 379-383:**

In the synthetic cases, the hydrological model operates on an hourly timestep with a maximum lead time of 24 hours, and ensemble simulations involve 100 members. The initial soil moisture is set to half of the maximum value. To ensure consistency in the

length of forecast sequences and the comparability of results, the start time for forecasting the same flood event under different lead times is set at the same moment - specifically, the 24 hours (maximum lead time) after the flood start time.

**Revised Manuscript LINES 400-404:**

In the real-world cases, the timestep and number of ensemble members are the same as in the synthetic cases. Similar to the synthetic cases, to ensure the comparability of results, the forecast start time for all lead times is uniformly delayed from the flood onset (the earliest available hourly data) by a duration corresponding to the maximum lead time. For some flood events, high flow occurred as early as the 9th hour after onset. To avoid missing the peak flow, the maximum lead time is set to 8 hours.

5. Discussion is an important part. I suggest it be a separate section. If the proposed method are used in distributed hydrological models (i.e. distributed Xin'anjiang model), what will be the results?

**Response:** Thank you for your suggestion, which has been extremely helpful for improving the paper. In the revised manuscript, we have included a separate discussion section, focusing on topics such as typical flood events and the limitations of the proposed method (LINES 612-680). This includes the challenges of applying the method to distributed hydrological models. Semi-distributed hydrological models, like the Xin'anjiang model used in this study, have smaller state variable dimensions, allowing for the direct application of the proposed state updating scheme. However, in distributed models where each computational grid (e.g., DEM-based grids) has its own state variables, the state dimension becomes large, making direct application inefficient or prone to spurious correlations from distant observations. To resolve this, we recommend applying covariance localization to AEnKF (Janjić et al., 2011, <https://doi.org/10.1175/2011MWR3552.1>) or other localization techniques (Khaniya et al., 2022, <https://doi.org/10.1016/j.jhydrol.2022.127651>). For instance, in covariance localization, a localization radius RL is set, and the forecast error covariance matrix is adjusted using a correlation matrix derived from the Schur product theorem. This study focuses on jointly assimilating soil moisture and streamflow using AEnKF, and performing localization on AEnKF is beyond the scope of this research. We will explore this further in future work.

**Revised Manuscript LINES 612-680:**

## **6. Discussion**

### **6.1 Discussion of AEnKF time window in synthetic cases**

In the study of assimilation windows for AEnKF in synthetic cases, we found that longer assimilation windows do not necessarily yield better results (Fig. 3). This is primarily because a longer time window includes too much historical information, which may have a weak correlation with the current state variables. Due to the nonlinearity of the hydrological model, where overly long windows can result in the system assimilating excessive noise, which negates the benefits derived from incorporating past observations. Tao et al. (2016) obtained similar results when studying the assimilation window length (1-3 hour) for the assimilation of observed discharge only. They found that the 2-hour time window generally yielded better assimilation results than the 3-hour time window, while the 1-hour time window performed the worst.

## **6.2 Discussion of two flood events in real-world cases**

In flood simulation and forecasting, peak flow rates are a primary focus for researchers. Using the two flood events with the most significant peak flow errors in the OL mode in 2023 (No.2023040308 and No.2023052008) as case studies, we examined the variations in free water storage and discharge at the catchment outlet.

Fig. 12 display the hydrographs simulated for No.2023040308. Black lines (dots) signify observed values. Grey lines and bands represent the ensemble mean and range of the OL, respectively. Similarly, green lines and bands illustrate the ensemble mean and range for the AEnKF. In examining the time series of free water storage, it is evident that observational data points almost never fall within the grey bands of the OL scheme. This indicates a notable difference between the soil moisture levels simulated by the Xin'anjiang model and those derived from observational data. Both AEnKFS and AEnKFSQ exhibit similar update patterns, where the post-update ensemble mean values significantly shift towards observational data. Concurrently, this adjustment expands the ensemble bands, indicating an increase in ensemble simulation accuracy for AEnKFS and AEnKFSQ, along with an increased ensemble spread. In the analysis of the discharge time series, it becomes evident that the ensemble distribution from the AEnKF aligns more closely with observational data and presents a narrower bandwidth than that of the OL. This trend suggests that the ensemble accuracy with AEnKF exceeds that of the OL scheme, and also demonstrates a reduced ensemble spread. Furthermore, the ensemble distribution observed during peak periods is more expansive than during the onset and recession periods of flood. This is attributed to the error models applied. These models introduce larger perturbations in the assimilation system during peak periods, leading to a broader ensemble distribution, which, in turn, ensures

a more effective assimilation during these critical periods. In examining the time series of discharge, it is noted that both AEnKFQ and AEnKFS significantly reduced the height of the simulated flood peak. The AEnKFQ scheme shows effectiveness around the 20th hour, following the assimilation of approximately 20 discharge observations, achieving a relative error of 17% in the simulated flood peak (maximum instantaneous flow) compared to the observed peak. AEnKFS started effectively updating the discharge following the assimilation of the third group of soil moisture observations at the 17th hour, which led to a flood peak relative error of 13%. The AEnKFSQ scheme successfully amalgamates the strengths of both, culminating in a reduced flood peak relative error of merely 8%.

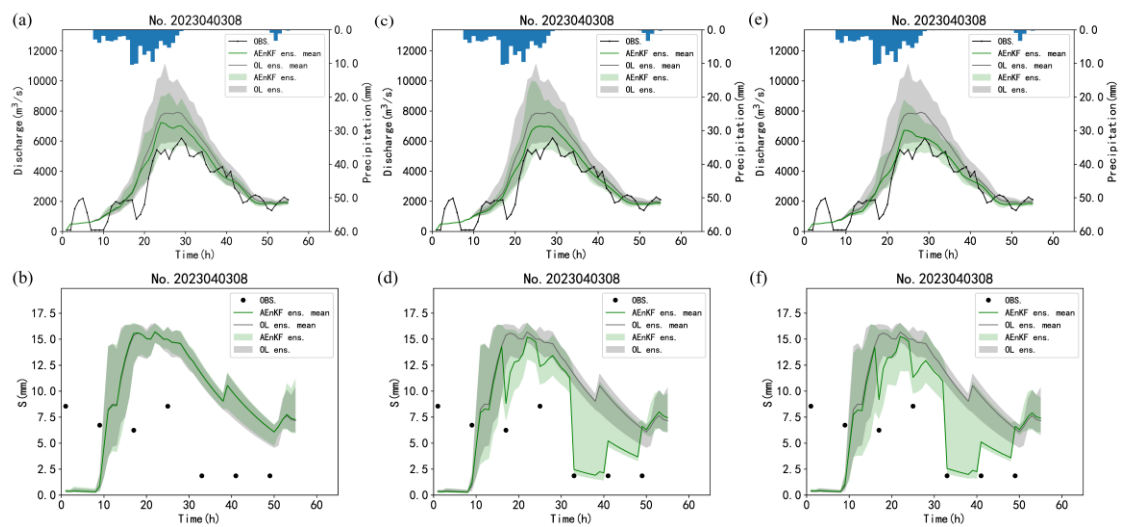

**Fig. 12. Hydrograph during flood event labeled No.2023040308. (a-b) AEnKF<sub>Q</sub> Scheme, (c-d) AEnKF<sub>S</sub> Scheme, (e-f) AEnKF<sub>SQ</sub> Scheme. The upper panel shows the discharge at the catchment outlet, and the lower panel displays the free water storage in sub-basin 1.**

In the case of flood event labeled No.2023052008, as illustrated in Fig. 13, the time series exhibits a similar pattern to No. 2023040308. The peak flooding occurred between the 25th and 33rd hours, which corresponds to the period between the fourth and fifth sets of soil moisture observations. During this interval, there is a notable and rapid increase in free water storage. Fig. 13 (c) indicates that the AEnKF<sub>S</sub> fails to effectively adjust the discharge volumes around the peak period. Conversely, the AEnKF<sub>Q</sub> scheme, which focused on updating cumulative channel flow, successfully rectified the peak flooding. Owing to the ineffectiveness of free water content updates in discharge correction, the assimilation impact of AEnKF<sub>SQ</sub> closely matched that of AEnKF<sub>Q</sub>. In summary, it is apparent that AEnKF<sub>SQ</sub> effectively integrates the strengths of both the AEnKF<sub>S</sub> and AEnKF<sub>Q</sub> schemes. Even when one of these strategies fails to update effectively, AEnKF<sub>SQ</sub> still manages to enhance the precision of discharge predictions.



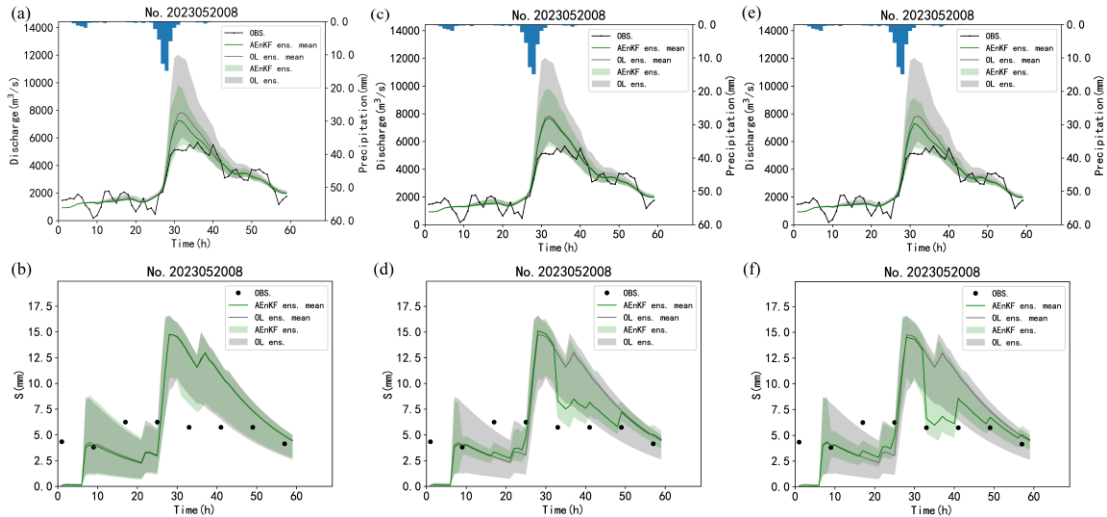

**Fig. 1. Hydrograph during flood event labeled No.2023052008. (a-b) AEnKF<sub>Q</sub> Scheme, (c-d) AEnKF<sub>S</sub> Scheme, (e-f) AEnKF<sub>SQ</sub> Scheme. The upper panel shows the discharge at the catchment outlet, and the lower panel displays the free water storage in sub-basin 1.**

### 6.3 Limitations

The Xin'anjiang model is a conceptual hydrological model that generalizes the rainfall-runoff process. Its most prominent feature is performing runoff production calculations based on the saturation-excess runoff mechanism, meaning net rainfall is first entirely used to replenish soil water, and once the soil moisture content in the unsaturated zone reaches field capacity, all subsequent net rainfall is used to generate runoff. Therefore, the Xin'anjiang model is only suitable for humid and semi-humid regions where the saturation-excess runoff mechanism is dominant and is not applicable to arid and semi-arid regions. However, it is important to note that the state updating method proposed in this study is not limited to coupling with the Xin'anjiang model. In fact, this method can be easily coupled with any lumped or semi-distributed hydrological model that includes state variables related to soil moisture and channel storage. When coupled with hydrological models suitable for semi-arid and arid regions, it can be effectively applied in those areas.

Semi-distributed hydrological models, like the Xin'anjiang model used in this study, have smaller state variable dimensions, allowing for the direct application of the proposed state updating scheme. However, in distributed models where each computational grid (e.g., DEM-based grids) has its own state variables, the state dimension becomes large, making direct application inefficient or prone to spurious correlations from distant observations. To resolve this, we recommend applying covariance localization to AEnKF (Janjić et al., 2011) or other localization techniques (Khaniya et al., 2022). For instance, in covariance localization, a localization radius (RL) is set, and the forecast error covariance matrix is adjusted using a correlation matrix derived from the Schur product theorem. This study focuses on jointly assimilating soil moisture and streamflow using AEnKF, and performing localization on AEnKF is beyond the scope of this research. We will explore this further in future

work.

6. Section 5.1.3, only 6 flood events are selected for analysis, could you add some flood events in 2024? Could you please provide the simulated hydrographs by the assimilation schemes for the 6 events?

**Response:** Thank you for your suggestion. We have realized that the most recent year's flood data was not utilized. Recently, we collected data of two flood events (No.2024040100 and No.2024042900) in 2024, as shown in Section S4 of the supplement document (LINES S106-S123). We have added simulations and analyses of these two flood events in both the synthetic and real-world cases. Consequently, Figures 3-11, Table 3, and the corresponding results have been updated. The new results can be found in "5 Results" section of the revised manuscript (LINES 416-611) and are not presented here. It is important to emphasize that the addition of the 2024 flood events did not alter the main conclusions of this study, which potentially further validates the general applicability of the proposed method.

We have also included the hydrographs for all eight flood events, please see the revised supplement document (S5. Hydrographs in Real-world Cases).

**Revised Supplement LINES S106-S123:**

This hydro-meteorological data utilized in the study spanning from 2014 to 2024, provided by the Hunan Provincial Hydrological Bureau, including evaporation, precipitation, and discharge data. Within the catchment, there are 17 rain gauges, one evaporation observation station, and four discharge observation stations. Evaporation data are derived from daily pan evaporation measurements using the E-601 pan, with hourly values calculated as 1/24th of the daily measurements. Notably, with only one evaporation observation station in the catchment, it is assumed that the observed evaporation is spatially uniform. When multiple rain gauges exist within a sub-catchment, the area-averaged rainfall is calculated as the arithmetic mean of all gauge observations. For discharge observation stations, Wuqiangxibashang (WQXBS) serves as the outlet observation station, while the remaining three stations Hexi (HX), Pushi (PS), and Gaochetou (GCT) measure inflow. Hourly observations of precipitation and discharge are intermittent, thus hourly data are only available during flood events, with daily data available at other times. Fifteen flood events from 2014 to 2018 were used for model calibration, and sixteen events from 2019 to 2024 for model validation. Considering soil moisture data availability, eight flood events in 2023 and 2024 were used for assimilation studies. For an overview of these flood events, refer to Table S4-1. The statistical characteristics of the observed and simulated peak flows are presented in Table S4-2.

**Table S4-1. List of flood events investigated in this study**

|                             | Serial number               | Start date       | End date         | Observed<br>Peak flow<br>(m <sup>3</sup> /s) | Simulated<br>Peak flow<br>(m <sup>3</sup> /s) |
|-----------------------------|-----------------------------|------------------|------------------|----------------------------------------------|-----------------------------------------------|
| calibration                 | No.2014052300               | 2014/05/23 00:00 | 2014/05/27 20:00 | 17356                                        | 17335                                         |
|                             | No.2014070300               | 2014/07/03 00:00 | 2014/07/06 08:00 | 22705                                        | 21564                                         |
|                             | No.2014071400               | 2014/07/14 00:00 | 2014/07/19 00:00 | 35725                                        | 35648                                         |
|                             | No.2015060121               | 2015/06/01 21:00 | 2015/06/07 01:00 | 17762                                        | 17085                                         |
|                             | No.2015060718               | 2015/06/07 18:00 | 2015/06/10 18:00 | 12017                                        | 11018                                         |
|                             | No.2015062023               | 2015/06/20 23:00 | 2015/06/24 09:00 | 19196                                        | 16971                                         |
|                             | No.2016050703               | 2016/05/07 03:00 | 2016/05/11 06:00 | 13051                                        | 12191                                         |
|                             | No.2016062017               | 2016/06/20 17:00 | 2016/06/21 21:00 | 12472                                        | 10268                                         |
|                             | No.2016062720               | 2016/06/27 20:00 | 2016/06/30 03:00 | 14996                                        | 13072                                         |
|                             | No.2016070311               | 2016/07/03 11:00 | 2016/07/08 12:00 | 22278                                        | 21016                                         |
|                             | No.2017052208               | 2017/05/22 08:00 | 2017/05/25 19:00 | 8872                                         | 8926                                          |
|                             | No.2017062711               | 2017/06/27 11:00 | 2017/07/05 12:00 | 32147                                        | 32121                                         |
|                             | No.2017081121               | 2017/08/11 21:00 | 2017/08/16 00:00 | 13091                                        | 14958                                         |
|                             | No.2018053010               | 2018/05/30 10:00 | 2018/06/03 16:00 | 7348                                         | 7462                                          |
| No.2018092518               | 2018/09/25 18:00            | 2018/09/27 05:00 | 8518             | 7495                                         |                                               |
| validation                  | No.2019051905               | 2019/05/19 05:00 | 2019/05/22 00:00 | 14024                                        | 13142                                         |
|                             | No.2019070700               | 2019/07/07 00:00 | 2019/07/16 12:00 | 14046                                        | 13358                                         |
|                             | No.2020070800               | 2020/07/08 00:00 | 2020/07/09 18:00 | 25963                                        | 23428                                         |
|                             | No.2020071823               | 2020/07/18 23:00 | 2020/07/20 16:00 | 18688                                        | 15459                                         |
|                             | No.2020091500               | 2020/09/15 00:00 | 2020/09/21 08:00 | 20829                                        | 20393                                         |
|                             | No.2021050300               | 2021/05/03 00:00 | 2021/05/05 00:00 | 8021                                         | 8397                                          |
|                             | No.2021051112               | 2021/05/11 12:00 | 2021/05/27 00:00 | 13347                                        | 12433                                         |
|                             | No.2021060300               | 2021/06/03 00:00 | 2021/06/07 00:00 | 8391                                         | 7693                                          |
|                             | <b><u>No.2023040308</u></b> | 2023/04/03 08:00 | 2023/04/05 14:00 | 6192                                         | 7891                                          |
|                             | <b><u>No.2023050416</u></b> | 2023/05/04 16:00 | 2023/05/06 17:00 | 4747                                         | 4244                                          |
|                             | <b><u>No.2023052008</u></b> | 2023/05/20 08:00 | 2023/05/22 18:00 | 5660                                         | 7702                                          |
|                             | <b><u>No.2023062100</u></b> | 2023/06/21 00:00 | 2023/06/25 19:00 | 6940                                         | 5834                                          |
|                             | <b><u>No.2023063000</u></b> | 2023/06/30 00:00 | 2023/07/01 14:00 | 9317                                         | 7809                                          |
|                             | <b><u>No.2023072516</u></b> | 2023/07/25 16:00 | 2023/07/27 18:00 | 8449                                         | 7611                                          |
| <b><u>No.2024040100</u></b> | 2024/04/01 00:00            | 2024/04/03 01:00 | 5430             | 6286                                         |                                               |
| <b><u>No.2024042900</u></b> | 2023/04/29 00:00            | 2024/05/01 17:00 | 5735             | 5754                                         |                                               |

<sup>a</sup> The flood events utilized for assimilation research are indicated by bold text with an underline.

**Table S4-2. Statistical characterization of peak flow**

|                        |                  | Mean<br>(m <sup>3</sup> /s) | standard<br>deviation<br>(m <sup>3</sup> /s) | Minim-<br>um<br>(m <sup>3</sup> /s) | Maxi-<br>mum<br>(m <sup>3</sup> /s) | Median<br>(m <sup>3</sup> /s) | Skew-<br>ness | Kurt-<br>osis | Coefficient<br>of<br>Variation | 95% confidence<br>interval<br>(m <sup>3</sup> /s) |
|------------------------|------------------|-----------------------------|----------------------------------------------|-------------------------------------|-------------------------------------|-------------------------------|---------------|---------------|--------------------------------|---------------------------------------------------|
| observed<br>peak flow  | Calibr-<br>ation | 15982                       | 8049                                         | 7348                                | 35725                               | 14996                         | 1.03          | 0.55          | 0.50                           | (11534, 20431)                                    |
|                        | Valid-<br>ation  | 11255                       | 6343                                         | 4747                                | 25963                               | 8420                          | 0.89          | 0.37          | 0.56                           | (7879, 14630)                                     |
| Simulated<br>Peak flow | Calibr-<br>ation | 15942                       | 8142                                         | 7462                                | 35648                               | 14958                         | 0.97          | 0.22          | 0.51                           | (11444, 20440)                                    |
|                        | Valid-<br>ation  | 10596                       | 5669                                         | 4244                                | 23428                               | 7850                          | 0.87          | -0.15         | 0.53                           | (7578, 13614)                                     |

**Revised Supplement Part S5:  
S5. Hydrographs in Real-world Cases**

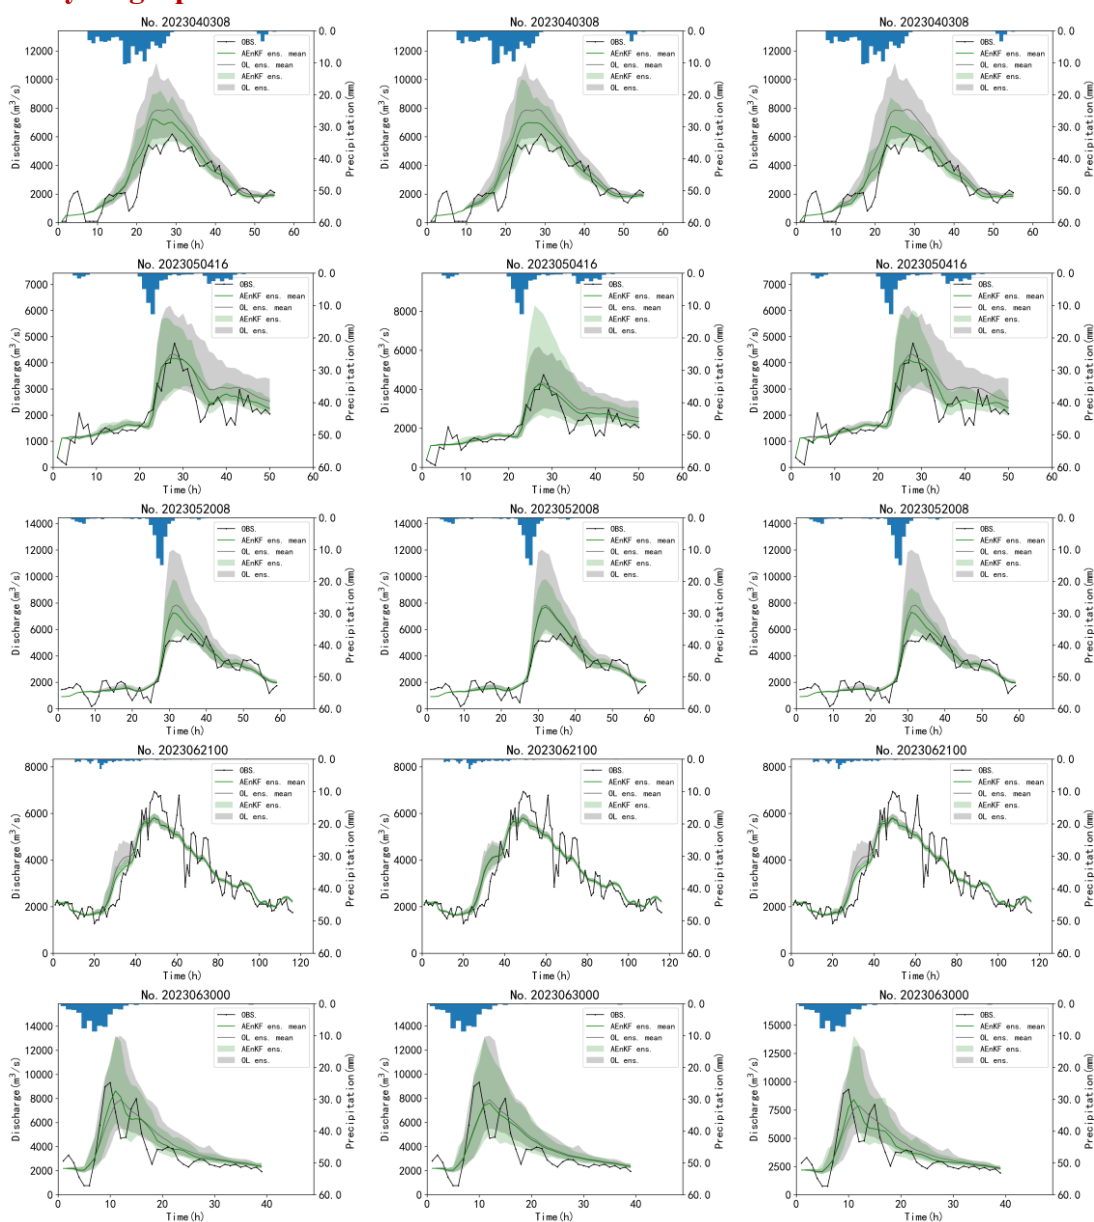

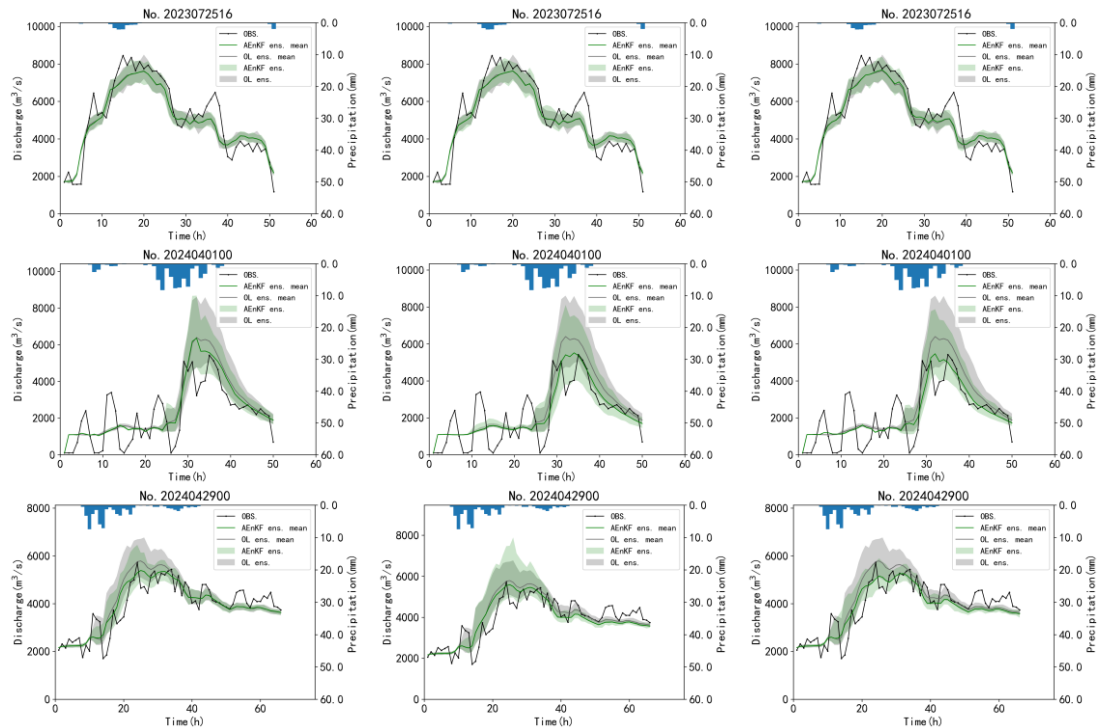

**Figure S5-1. Hydrographs in real-world cases. The left panel shows the AEnKF<sub>Q</sub> scheme, the center panel shows the AEnKF<sub>S</sub> scheme, and the right panel shows the AEnKF<sub>SQ</sub> scheme**

**Special thanks to you for your good comments. Other revisions to the manuscript can be found in " Point-by-point response to Anonymous Reviewer #1" and " Point-by-point response to Zongping Ren's comments".**

## **Reference mentioned in the responses**

Janjić, T., Nerger, L., Albertella, A., Schröter, J., and Skachko, S.: On domain localization in ensemble-based Kalman filter algorithms. *Mon. Weather Rev.*, 139(7), 2046-2060, <https://doi.org/10.1175/2011MWR3552.1>, 2011.

Khaniya, M., Tachikawa, Y., Ichikawa, Y., and Yorozu, K.: Impact of assimilating dam outflow measurements to update distributed hydrological model states: Localization for improving ensemble Kalman filter performance. *J. Hydrol.*, 608, 127651, <https://doi.org/10.1016/j.jhydrol.2022.127651>, 2022.

## Point-by-point response to Zongping Ren's comments

We would like to sincerely appreciate you for the review of our manuscript "State updating in the Xin'anjiang Model: Joint assimilating streamflow and multi-source soil moisture data via Asynchronous Ensemble Kalman Filter with enhanced Error Models" and the constructive suggestions. We sincerely believe these comments facilitate the quality improvement of this manuscript. All the comments have been considered and a point-by-point response has been provided below.

The point-by-point response is formatted as follows:

- Reviewer's comments are shown in blue
- Authors' response are shown in black
- Authors' changes in the manuscript are shown in red. The line numbers indicated in this response are those in the "Revised Manuscript with no changes marked" document
- The unchanged parts of the manuscript are shown in black

---

The study is briefly based on the development of the Xin'anjiang hydrological model. For this aim, Asynchronous Ensemble Kalman Filter (AEnKF) with enhanced error model is used to joint assimilate streamflow and multi-source soil moisture data. Furthermore, this paper proposes a novel method to integrate CLDAS soil moisture data with in situ observations, enhancing the accuracy of the dataset. Wuqiangxi catchment is selected for the application. The results produced by the AEnKF assimilating different types of observations are then evaluated by some performance metrics. The work is extensive and well-structured. The subject is novel and the study is valuable in terms of the hydrological forecasting in terms of flood events in river basins. However, the discussion of main and latest studies on the subject needs to be further strengthened. Some suggestions and comments to the authors are presented below:

**Response:** Thank you for your concise summary of the paper and for your positive feedback on our study. We have carefully considered all of your comments and responded them in the subsequent specific comments section.

## Specific Comments:

---

1. What are main differences between AEnKF and EnKF? Supported and related studies about AEnKF should be strongly presented in Introduction to emphasize highlights of the paper.

**Response:** Thank you for your comment. The EnKF is a synchronous assimilation method that assimilates observations at the current time into the hydrological model at the analysis step. This means that EnKF updates the state variables of the Xin'anjiang model based only on observations from the current time step. In contrast, AEnKF is a more advanced asynchronous assimilation method, allowing for the assimilation of both current and past observations during the analysis step. Specifically, in this study, AEnKF assimilates observations from the current time and the previous two hours (tw is the assimilation time window) into the Xin'anjiang model, updating the model's state variables. This asynchronous assimilation helps to consider the complex nonlinear relationships between observations at multiple times and the hydrological model's state variables. We have included a discussion on existing research and applications of the AEnKF method in the Introduction section of the revised manuscript (LINES 77-90).

### **Revised Manuscript LINES 77-90:**

The AEnKF technique was first applied by Krymskaya (2013) to the problem of history matching in reservoir engineering. The study revealed that AEnKF outperforms EnKF in parameter estimation and utilizes the data with similar efficiency. The AEnKF is recognized for its simplicity and high computational efficiency, offering significant potential in short-term flood forecasting applications. Despite its promise, the scope of research in this area is relatively limited. Among the few studies conducted, Mazzoleni et al. (2018) evaluated AEnKF assimilation in simplified flow routing models, highlighting its exceptional performance in both lumped and distributed flow routing. Tao et al. (2016) summarized the hydrological forecasting test conducted during the 2014 IPHEX-IOP campaign, proposing a framework for improving flood prediction in mountainous regions through the assimilation of discharge data using the AEnKF method, with a focus on enhancing forecast accuracy and reducing uncertainty. In addition, Rakovec et al. (2015) and our earlier study (Gong et al., 2024) applied the AEnKF to the distributed HBV-96 model and the Xin'anjiang model, respectively. These studies examined effectiveness of AEnKF in real-time correction through the assimilation of observed discharge in distributed and semi-distributed hydrological models, revealing that AEnKF outperforms the standard EnKF. However, these studies assimilate only a single type of observational data (e.g., observed discharge) using the AEnKF method, which does not take full advantage of the AEnKF.

2. Line 231. The SM is mentioned but not explained. Please insert a definition the first time it is mentioned.

**Response:** Thank you for your suggestion. In response to the suggestions from Anonymous Reviewer #2, we have revised the structure of the paper by introducing the hydrological model at the beginning of the “Methodology and method” section. As a result, the definition of the parameter SM, averaged free water storage capacity, is now provided the first time it is mentioned in [Table 1](#).

**Revised Manuscript [Table 1](#):**

**Table 1. Parameters of the Xin'anjiang model**

| Parameter <sup>a</sup> | Description                                                    | Synthetic cases | Real-world cases |
|------------------------|----------------------------------------------------------------|-----------------|------------------|
| <b><u>K</u></b>        | the ratio of potential evapotranspiration to pan evaporation   | 1.00            | 0.95             |
| <i>C</i>               | Evapotranspiration coefficient of deeper layer                 | 0.13            | 0.05             |
| <i>WUM</i>             | Averaged tension water capacity of upper layer (mm)            | 12.5            | 19.9             |
| <i>WLM</i>             | Averaged tension water capacity of lower layer (mm)            | 75.0            | 64.4             |
| <i>B</i>               | Exponent of the tension water capacity curve                   | 0.40            | 0.38             |
| <i>WM</i>              | Averaged tension water capacity (mm)                           | 125.0           | 119.8            |
| <i>IM</i>              | Percentage of impervious areas in the catchment                | 0.01            | 0.03             |
| <b><u>SM</u></b>       | Averaged free water storage capacity (mm)                      | 30.0            | 16.7             |
| <i>EX</i>              | Exponent of the free water capacity curve                      | 1.25            | 1.50             |
| <b><u>KI</u></b>       | Daily outflow coefficient of free water storage to interflow   | 0.35            | 0.02             |
| <b><u>KG</u></b>       | Daily outflow coefficient of free water storage to groundwater | 0.35            | 0.68             |
| <i>CI</i>              | Daily recession constant of the interflow storage              | 0.70            | 0.52             |
| <b><u>CG</u></b>       | Daily recession constant of the groundwater storage            | 0.99            | 0.93             |
| <b><u>CS</u></b>       | Daily recession constants of channel network storage           | 0.50            | 0.88             |
| <b><u>LAG</u></b>      | Lag in time (h)                                                | 0               | 1                |
| <i>XE</i>              | Parameters of the Muskingum method                             | 0.25            | 0.01             |

<sup>a</sup> Parameters in bold and underline text indicate sensitive parameters.

3. Section 2.3. I am not clear on how the hydrological model simulates infiltration. What are the infiltration parameters? They don't seem to be shown in Table 1. It is not necessary to explain your hydrological model again in the manuscript, but I need to understand why infiltration parameters are not considered in the model perturbation.

**Response:** Thank you for your comment. We have addressed your questions individually below.

First, we should explain to you the method of calculating the runoff of the Xin'anjiang model. The Xin'anjiang model is a conceptual hydrological model that generalizes the rainfall-runoff process. Its most prominent feature is performing runoff production calculations based on the saturation-excess runoff mechanism, meaning net



rainfall is first entirely used to replenish soil water, and once the soil moisture content in the unsaturated zone reaches field capacity, all subsequent net rainfall is used to generate runoff. Therefore, the Xin'anjiang model does not involve infiltration parameters. In the revised manuscript, we have explained the saturation-excess runoff mechanism in the “Hydrological Model” section (LINES 175-176). Detailed theoretical derivations of the soil evapotranspiration and runoff generation in the Xin'anjiang model are provided below. If you are interested in other aspects of the Xin'anjiang model, we recommend the famous paper "The Xinanjiang Model Applied in China" (Zhao, 1992, [https://doi.org/10.1016/0022-1694\(92\)90096-E](https://doi.org/10.1016/0022-1694(92)90096-E)).

### (1) Evapotranspiration

The Xin'anjiang model divides the soil into upper, lower, and deep layers based on vertical heterogeneity. It uses a three-layer evapotranspiration model to calculate actual evapotranspiration, involving parameters such as upper layer tension water capacity ( $WUM$ , mm), lower layer tension water capacity ( $WLM$ , mm), average basin tension water capacity ( $WM$ , mm), evapotranspiration conversion coefficient ( $K$ ), and deep layer evapotranspiration coefficient ( $C$ ). The three-layer evapotranspiration model is with the following principles: the upper layer evaporates according to its evapotranspiration capacity; if the upper layer's soil moisture content is insufficient, the remaining evapotranspiration capacity is drawn from the lower layer. The lower layer's evaporation is proportional to the evapotranspiration capacity and its soil moisture storage, with the ratio of the calculated lower layer evaporation to the remaining evapotranspiration capacity not less than the deep layer evapotranspiration coefficient. If this ratio is not met, the deficit is supplemented by the lower layer water storage. If the lower layer water storage is insufficient, it is supplemented by the deep layer water storage. The calculation formula for the three-layer evapotranspiration model can be summarized as follows.

First, the evapotranspiration capacity  $EP$  (mm) is calculated using the pan evaporation ( $EM$ ).

$$EP = K \cdot EM \quad (R1)$$

When  $P + WU \geq EP$ , the evapotranspiration for the upper, lower, and deep layers ( $EU$ ,  $EL$ , and  $ED$ ) are:

$$\begin{cases} EU = EP \\ EL = 0 \\ ED = 0 \end{cases} \quad (R2)$$

When  $P + WU < EP$ , the upper layer evapotranspiration ( $EU$ ) is:

$$EU = P + WU \quad (R3)$$

On this basis, the calculation of the lower layer evapotranspiration ( $EL$ ) and the deep layer evapotranspiration ( $ED$ ) is divided into three cases:

1) When  $WL \geq C \cdot LM$ ,

$$\begin{cases} EL = (EP - EU) \cdot WL/WLM \\ ED = 0 \end{cases} \quad (R4)$$

2) When  $WL < C \cdot LM$  and  $WL \geq C \cdot (EP - EU)$ ,

$$\begin{cases} EL = C \cdot (EP - EU) \\ ED = 0 \end{cases} \quad (R5)$$

3) When  $WL < C \cdot LM$  and  $WL < C \cdot (EP - EU)$ ,

$$\begin{cases} EL = WL \\ ED = C \cdot (EP - EU) - WL \end{cases} \quad (R6)$$

Once the upper, lower, and deep layer evapotranspiration ( $EU$ ,  $EL$ , and  $ED$ ) are fully calculated, the total evapotranspiration  $E$  (mm) is the sum of these three amounts:

$$E = EU + EL + ED \quad (R7)$$

## (2) Runoff generation

The Xin'anjiang model uses the saturation-excess runoff generation method to calculate runoff. Net rainfall ( $P-E$ ) first replenishes soil moisture, with no runoff generated until the soil moisture reaches field capacity. Once the soil is saturated, all net rainfall contributes to runoff. The Xin'anjiang model uses a tension water capacity curve to characterize the spatial heterogeneity of soil moisture in the catchment, represented as:

$$\frac{f_A}{Area} = \left[ 1 - \left( 1 - \frac{W'}{WMM} \right)^B \right] (1 - IM) + IM \quad (R8)$$

Where,  $f_A$  is the runoff production area ( $\text{km}^2$ );  $Area$  is the basin area ( $\text{km}^2$ );  $W'$  is the point tension water capacity in the basin (mm);  $WMM$  is the maximum point tension water capacity (mm);  $WM$  is the average basin tension water capacity (mm);  $B$  is the exponent of the tension water storage capacity curve;  $IM$  is the proportion of the impermeable area to the total basin area. Let  $W$  be the average basin tension water storage at the current time (mm), and  $\xi_W$  be the vertical coordinate of  $W$  on the tension water capacity curve (mm). Integrating  $W'$  from 0 to  $\xi_W$  in Eq. (R8) yields:

$$W = \frac{(1 - IM) \cdot WMM}{B + 1} \left[ 1 - \left( 1 - \frac{\xi_W}{WMM} \right)^{B+1} \right] \quad (R9)$$

Substituting  $\xi_W = WMM$  and  $W = WM$  into Eq. (R9) yields:

$$WMM = \frac{WM \cdot (B + 1)}{(1 - IM)} \quad (R10)$$

Substituting Eq. (R10) into Eq. (R9) yields:

$$\xi_W = WMM \left[ 1 - \left( 1 - \frac{W}{WMM} \right)^{\frac{1}{1+B}} \right] \quad (R11)$$

The total runoff  $R$  (expressed in runoff depth, mm) can be expressed as:

$$R = \int_{\xi_W}^{P-E+\xi_W} \frac{f_A}{Area} dW' \quad (R12)$$

No runoff is generated when  $P - E \leq 0$ . When  $P - E > 0$ , runoff is generated, and the total runoff  $R$  is calculated as follows in two scenarios:

1) When  $P - E + \xi_W < WMM$ ,

$$R = P - E - WM + W + WM \left[ 1 - \left( \frac{P - E + \xi_W}{WMM} \right)^{(1+B)} \right] \quad (R13)$$

2) When  $P - E + \xi_W \geq WMM$ ,

$$R = P - E - WM + W \quad (R14)$$

The Xin'anjiang model considers the vertical regulation of the vadose zone and uses a free water storage reservoir to divide the total runoff  $R$  into surface runoff  $RS$ , interflow  $RI$ , and groundwater runoff  $RG$ . The parameters involved include the averaged free water storage capacity  $SM$ , the exponent of the free water capacity curve  $EX$ , the daily outflow coefficient of free water storage to groundwater  $KG$ , and the daily outflow coefficient of free water storage to interflow  $KI$ .

Considering that the free water storage capacity is also spatially heterogeneous, the Xin'anjiang model uses the free water capacity curve to represent this heterogeneity:

$$\frac{f_A}{Area} = \left[ 1 - \left( 1 - \frac{S'}{SMM} \right)^B \right] \quad (R15)$$

Using a derivation similar to that of the tension water capacity curve, we obtain:

$$SMM = SM(EX + 1) \quad (R16)$$

$$\xi_S = SMM \left[ 1 - \left( 1 - \frac{S}{SM} \right)^{\frac{1}{1+EX}} \right] \quad (R17)$$

where  $S'$  is the point free water storage capacity in the basin (mm);  $SMM$  is the maximum point free water storage capacity (mm);  $SM$  is the average free water storage capacity (mm);  $EX$  is the exponent of the free water storage capacity curve;  $S$  is the average free water storage at the calculation timestep (mm); and  $\xi_S$  is the vertical coordinate of  $S$  on the free water capacity curve (mm).

The calculation for surface runoff  $RS$  is divided into two cases:

1) When  $P - E + \xi_S < SMM$ ,

$$RS = \left\{ P - E - SM + S + SM \left[ 1 - \left( \frac{P - E + \xi_S}{SMM} \right)^{(1+EX)} \right] \right\} FR \quad (R18)$$

2) When  $P - E + \xi_S \geq SMM$ ,

$$RS = (P - E - SM + S) \cdot FR \quad (R19)$$

The corresponding interflow  $RI$  and groundwater runoff  $RG$  are:

$$RI = \left( S + \frac{R - RS}{FR} \right) \cdot KI \cdot FR \quad (R20)$$

$$RG = \left( S + \frac{R - RS}{FR} \right) \cdot KG \cdot FR \quad (R21)$$

**Revised Manuscript LINES 175-176:**

The runoff generation is based on a saturation-excess mechanism, where runoff is produced only when the soil moisture in the unsaturated zone reaches field capacity.

4. Fig. 2. I suggest replacing the Yangtze River Basin with China to make it more understandable to the reader.

**Response:** Thank you for your suggestion. We have improved Figure 2 in the revised manuscript according to your suggestion.

**Revised Manuscript Figure 2:**

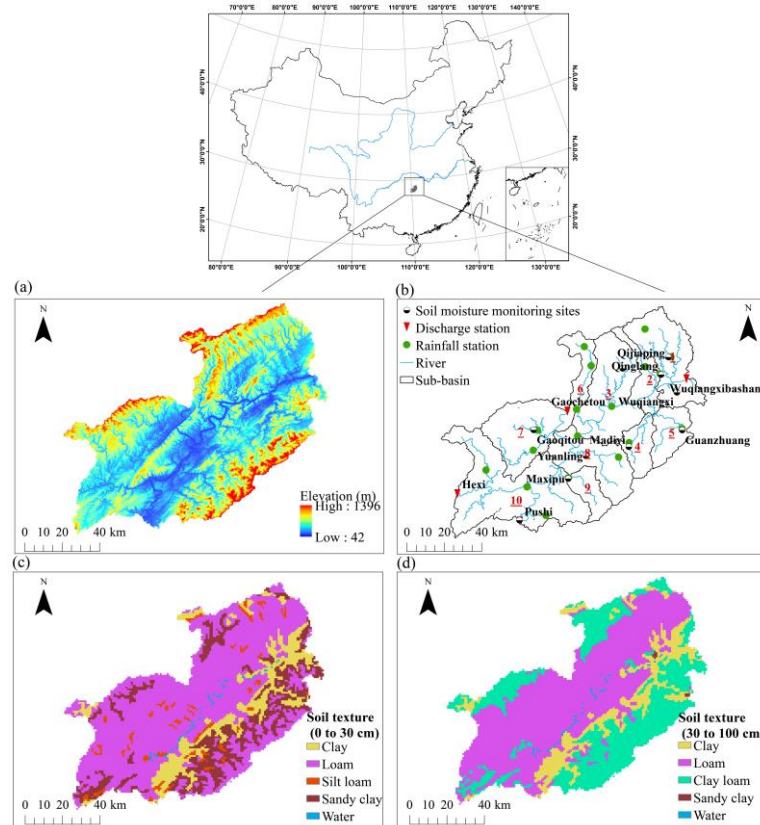

**Fig. 2 Study catchment. (a) Digital Elevation Map (DEM); (b) Sub-basins and observation stations; (c) Soil texture (0 to 30 cm); (d) Soil texture (30 to 100 cm).**

5. Section 5.1.2, Fig. 3. Could the authors explain why sometimes larger time window produces poorer results instead? Is it because observations that go too far back in time compromise the quality of real time?

**Response:** Thank you for your comment. As in the response to Anonymous Reviewer #1, this is primarily because a longer time window includes too much historical information, which may have a weak correlation with the current state variables. Including too much historical observational information in the assimilation system may lead to a degradation in assimilation performance. Tao et al. (2016) (<https://doi.org/10.1016/j.jhydrol.2016.02.019>) tested the performance of the standard AEnKF method with 1-3 hour assimilation time windows and obtained similar results. They found that the 2-hour time window generally yielded better assimilation results than the 3-hour time window, while the 1-hour time window performed the worst. We have discussed this phenomenon in the Discussion section of the revised manuscript (LINES 614-620).

**Revised Manuscript LINES 614-620:**

In the study of assimilation windows for AEnKF in synthetic cases, we found that longer assimilation windows do not necessarily yield better results (Fig. 3). This is primarily because a longer time window includes too much historical information, which may have a weak correlation with the current state variables. Due to the nonlinearity of the hydrological model, where overly long windows can result in the system assimilating excessive noise, which negates the benefits derived from incorporating past observations. Tao et al. (2016) obtained similar results when studying the assimilation window length (1-3 hour) for the assimilation of observed discharge only. They found that the 2-hour time window generally yielded better assimilation results than the 3-hour time window, while the 1-hour time window performed the worst.

6. Line 505-520, Fig. 7. There are flood events where the performance of the AEnKF remains superior to the OL even after 24 hours. Have authors provided an explanation for why the model correction persists for such an extended period in these cases?

**Response:** Thank you for your comment. We believe that the assimilation effect of AEnKF can last for more than 24 hours, mainly because the soil moisture state variables were effectively updated in these events. The initial soil moisture state at the forecast start time reflects the basin's wetness at that moment and significantly impacts forecast accuracy for a considerably long lead time. In Rakovec et al. (2015) (<https://doi.org/10.5194/hess-19-2911-2015>), the average temporal persistence of the

standard AEnKF assimilation effect could reach a 45-hour lead time, likely because they also updated the soil moisture state variables.

7. Section 6. This part needs some improvements. Currently, it is presented in broad terms. Specifically, the conclusions drawn from the calculated performance metrics should be detailed explicitly.

**Response:** Thank you for your suggestion. We have added the results of specific performance metrics to the Conclusion section of the revised manuscript (LINES 698-719), making the conclusions more objective.

**Revised Manuscript LINES 698-719:**

In synthetic case studies, while updating soil moisture state variables of the Xin'anjiang model, it is observed that effective updates are limited to free water storage and total tension water storage. This underscores the significance of choosing appropriate state variables for updates in the application of the AEnKF method. Further analysis revealed that with high-quality, hourly available observational data, all three assimilation schemes maintained their effectiveness for up to 24-hour lead time. Notably, AEnKF<sub>SQ</sub> demonstrated enhanced optimal single-value performance, overall ensemble performance, and ensemble reliability, surpassing both AEnKF<sub>S</sub> and AEnKF<sub>Q</sub>. Specifically, in the one-step forecast, the  $MR_{RMSE}$  for AEnKF<sub>SQ</sub> decreased by 0.11 and 0.16 compared to AEnKF<sub>S</sub> and AEnKF<sub>Q</sub>, respectively; the  $MR_{CRPS}$  for AEnKF<sub>SQ</sub> decreased by 0.10 and 0.15, and the  $MR_{RELI}$  decreased by 0.20 and 0.15 compared to AEnKF<sub>S</sub> and AEnKF<sub>Q</sub>, respectively. AEnKF<sub>SQ</sub>'s advantage in optimal single-value performance persists up to a 24-hour lead time.

In the real-world case studies, we merged soil moisture data from in-suit monitoring sites with the near-real-time CLDAS soil moisture data. This fusion produces spatially distributed data characterized by high temporal immediacy while addressing the limitation of point-scale in in-suit soil data. Contrasting with experiments using synthetic data, extending soil moisture observation intervals to 8 hours impacts the performance of the AEnKF<sub>S</sub> scheme. In one-step prediction, the AEnKF<sub>SQ</sub> scheme exhibits the highest level of accuracy with the  $MR_{RMSE}$  of 0.84. Concurrently, the simulation precision of the AEnKF<sub>Q</sub> scheme exceeds that observed in AEnKF<sub>S</sub>, with  $MR_{RMSE}$  values of 0.88 and 0.91, respectively. Variations in results are observed under different lead times. AEnKF<sub>SQ</sub> and AEnKF<sub>S</sub> consistently demonstrate an assimilation effect duration of 8 hours, in contrast to the 5-hour temporal persistence of assimilation effect of AEnKF<sub>Q</sub>. The use of AEnKF for updating cumulative channel flow markedly enhances the accuracy of discharge forecasting in a brief lead time. In contrast, the adjustment extent of discharge by updating free water storage in a single-step forecast might be less than that achieved with AEnKF<sub>Q</sub>. Nevertheless, it guarantees a more sustained assimilation effect. The AEnKF<sub>SQ</sub> integrates the strengths of the previous two

strategies, thereby improving discharge forecasting accuracy even when a particular strategy does not update effectively and prolonging the temporal persistence of the assimilation effect.

8. Are there any limitations or recommendations for the application of this study? Is the proposed methodology applicable to all regions? Can the method be applied in data-scarce regions with limited observations?

**Response:** Thank you for your comment. The Xin'anjiang model is based on the saturation-excess runoff generation mechanism, where net rainfall is first entirely used to replenish soil water, and once the soil moisture content in the unsaturated zone reaches field capacity, all subsequent net rainfall is used to generate runoff. This runoff generation mechanism is generally applicable to humid and semi-humid regions, making the Xin'anjiang model theoretically suitable only for these areas. Since humid regions in China are most affected by flood disasters and the Xin'anjiang model is currently the most widely used hydrological model in operational flood forecasting in China, this study uses the Xin'anjiang model as an example and tests it only in humid regions in China. However, it is important to emphasize that the AEnKF method with the enhanced error models proposed in this study can be easily coupled with any hydrological model, so its application is not limited to humid and semi-humid regions. In future research, we will focus on coupling and testing the AEnKF with enhanced error models and other hydrological models. The proposed method in this study involves assimilating observational data into the hydrological model, making it inapplicable in data-scarce regions. We have added a discussion of the limitations of this study in the revised manuscript (LINES 662-680).

**Revised Manuscript LINES 662-680:**

### **6.3 Limitations**

The Xin'anjiang model is a conceptual hydrological model that generalizes the rainfall-runoff process. Its most prominent feature is performing runoff production calculations based on the saturation-excess runoff mechanism, meaning net rainfall is first entirely used to replenish soil water, and once the soil moisture content in the unsaturated zone reaches field capacity, all subsequent net rainfall is used to generate runoff. Therefore, the Xin'anjiang model is only suitable for humid and semi-humid regions where the saturation-excess runoff mechanism is dominant and is not applicable to arid and semi-arid regions. However, it is important to note that the state updating method proposed in this study is not limited to coupling with the Xin'anjiang model. In fact, this method can be easily coupled with any lumped or semi-distributed hydrological model that includes state variables related to soil moisture and channel storage. When coupled with

hydrological models suitable for semi-arid and arid regions, it can be effectively applied in those areas.

Semi-distributed hydrological models, like the Xin'anjiang model used in this study, have smaller state variable dimensions, allowing for the direct application of the proposed state updating scheme. However, in distributed models where each computational grid (e.g., DEM-based grids) has its own state variables, the state dimension becomes large, making direct application inefficient or prone to spurious correlations from distant observations. To resolve this, we recommend applying covariance localization to AEnKF (Janjić et al., 2011) or other localization techniques (Khaniya et al., 2022). For instance, in covariance localization, a localization radius (RL) is set, and the forecast error covariance matrix is adjusted using a correlation matrix derived from the Schur product theorem. This study focuses on jointly assimilating soil moisture and streamflow using AEnKF, and performing localization on AEnKF is beyond the scope of this research. We will explore this further in future work.

9. As a crucial step in the study, the statistical characteristics of the data used (e.g., peak discharge) should be presented in detail. The statistical properties, including skewness, coefficient of variation, confidence intervals, boxplots for outlier data, distribution characteristics, minimum, maximum, and median values, etc., should be provided in a table.

**Response:** Thank you for your suggestion. In Supplement (part S4), we have included a table (Table S4-2) with the statistical characteristics of the peak flow for the flood events in this study, including the mean, standard deviation, minimum, maximum, median, skewness, kurtosis, coefficient of variation, and 95% confidence interval.

**Revised Supplement Table S4-2:**

**Table S4-2. Statistical characterization of peak flow**

|                        |                  | Mean<br>(m <sup>3</sup> /s) | standard<br>deviation<br>(m <sup>3</sup> /s) | Minim-<br>um<br>(m <sup>3</sup> /s) | Maxi-<br>mum<br>(m <sup>3</sup> /s) | Median<br>(m <sup>3</sup> /s) | Skew-<br>ness | Kurt-<br>osis | Coefficient<br>of<br>Variation | 95% confidence<br>interval<br>(m <sup>3</sup> /s) |
|------------------------|------------------|-----------------------------|----------------------------------------------|-------------------------------------|-------------------------------------|-------------------------------|---------------|---------------|--------------------------------|---------------------------------------------------|
| observed<br>peak flow  | Calibr-<br>ation | 15982                       | 8049                                         | 7348                                | 35725                               | 14996                         | 1.03          | 0.55          | 0.50                           | (11534, 20431)                                    |
|                        | Valid-<br>ation  | 11255                       | 6343                                         | 4747                                | 25963                               | 8420                          | 0.89          | 0.37          | 0.56                           | (7879, 14630)                                     |
| Simulated<br>Peak flow | Calibr-<br>ation | 15942                       | 8142                                         | 7462                                | 35648                               | 14958                         | 0.97          | 0.22          | 0.51                           | (11444, 20440)                                    |
|                        | Valid-<br>ation  | 10596                       | 5669                                         | 4244                                | 23428                               | 7850                          | 0.87          | -0.15         | 0.53                           | (7578, 13614)                                     |

10. I recommend including the error estimation and evaluation metrics section from the supplement as an appendix in the main document, rather than providing it as a separate



file. This will facilitate a more cohesive understanding for interested readers.

**Response:** Thank you for your suggestion. We have carefully considered your suggestions and provided a summary of these two sections in the main text (LINES 239-273 and LINES 332-346), ensuring that general readers can gain a comprehensive understanding without being overwhelmed by excessive technical details. For data assimilation experts interested in the technical specifics, they can find detailed information in the supplementary materials. On the other hand, the main focus of this study is the joint assimilation of multi-source data using the improved AEnKF, and the main text is already quite lengthy in fully presenting this focus. After careful consideration, we believe that providing the technical details of error estimation and evaluation metrics as supplementary material is a better choice to improve the readability of the paper and manage the length of the main text.

**Revised Manuscript LINES 239-273:**

### **2.3 Error estimation**

Both the EnKF and its variant, update model states by employing a weighted average of observational data and model forecasts. This process highlights the crucial role of model and observational errors in determining the effectiveness of the assimilation system. Particularly in rainfall-runoff modeling, where uncertainties in both model and observations are inherently ambiguous, generalizing these uncertainties is instrumental in acquiring refined approximations of suboptimal model states. A common technique involves adding unbiased noise to observations, model forcing and model states.

Observations involved in this study include discharge at catchment outlet and observed soil moisture. We generalize the observational errors as Gaussian perturbations related to the corresponding observed values (Weerts and El Serafy, 2006; Clark et al., 2008; Alvarez-Garreton et al., 2015). Given that rainfall serves as the most critical input information for the hydrological model, we employ log-normal multiplicative perturbations to describe the errors associated with rainfall, thereby representing the uncertainty in model forcing (McMillan et al., 2011; DeChant and Moradkhani, 2012). Moreover, we introduce a first-order autoregressive model to represent the temporal correlation within the observational errors and the forcing errors.

In the assimilation of observed discharge at catchment outlet, the key model state variable updated is cumulative channel flow. This variable represents the outflow from each sub-basin on the routing calculation unit (sub-reaches in this study), denoted as  $QC$ . As Li et al. (2014), this state variables are perturbed using a Gaussian function. When assimilating observed soil moisture, the model state variables representing soil humidity need to be updated. Specifically, this refers to the tension water storage (including upper, and lower layer tension water) and the free water storage in the Xin'anjiang model. In the Xin'anjiang model, the soil moisture state variables receive

physical constraints. The free water storage (denoted as  $S$ ) reflects the soil moisture in the topsoil layer, specifically the humus layer (Yao et al., 2012). Therefore, it is assumed that the free water storage can be considered to range between the saturation moisture content and the field capacity, with its upper limit controlled by the parameter  $SM$  and the lower limit set to zero. On the other hand, the tension water storage (denoted as  $W$ ) represents the soil moisture throughout the entire soil profile, encompassing the whole unsaturated zone (Yao et al., 2012). Consequently, the tension water storage is considered to vary between the field capacity and the wilting point, with its upper limit governed by the parameter  $WM$  and the lower limit being zero. The  $WU$ ,  $WL$ , and  $WD$  represent the upper, lower, and deep layer tension water storage, respectively, with their upper limits controlled by the parameters  $WUM$ ,  $WLM$ , and  $WDM$ , and  $WM = WUM + WLM + WDM$ . When the variables approach the upper or lower limit, the Gaussian perturbations may cause it to violate the physical constraints. If the hydrological model corrects it, it will lead to the truncation error in the background field predictions. We introduce the Bias-corrected Gaussian Error Model (BGEM) proposed by Ryu et al. (2009), aimed at reducing biases that emerge due to adherence to physical constraints.

The aforementioned error models are controlled by parameters known as ‘hyperparameters’ (Thiboult and Anctil, 2015), such as the hyperparameters for Gaussian perturbations are mean and standard deviation. We apply the Maximum a posteriori estimation method (MAP) to identify the globally optimal values of these hyperparameters (Gong et al., 2023). The MAP method aims to maximize the probability density of the hyperparameters with given the observed historical flood events. Supplement 1 provides a comprehensive introduction to the implementation of error estimation in this study.

### **Revised Manuscript LINES 332-346:**

#### **2.5 Evaluation metrics**

In this study, we use four metrics to assess the assimilation effectiveness, focusing on both optimal single-value and ensemble performances, as suggested by McInerney et al. (2020). The optimal single-value performance, indicating the highest simulation accuracy, is represented by the ensemble mean values of the simulated discharge. The ensemble performance evaluation, in contrast, examines the simulated discharge ensemble through the lens of ensemble forecasting, covering both the overall performance of ensemble and its reliability.

For quantitatively assessing the optimal single-value performance, we employ the Normalized Nash-Sutcliffe efficiency coefficient (NNSE) (Nossent and Bauwens, 2012) and the root mean squared error (RMSE). The Continuous Ranked Probability Score (CRPS), introduced by Hersbach (2000), measures the overall performance of ensemble. The reliability component of CRPS, denoted as RELI, focuses on assessing ensemble reliability. For these metrics, we use the ratios of AEnKF to Open Loop (ensemble run

without assimilation), represented as  $R_{RMSE}$ ,  $R_{CRPS}$ , and  $R_{RELI}$ . Moreover, the event-averaged values of these ratios are denoted as  $MR_{RMSE}$ ,  $MR_{CRPS}$ , and  $MR_{RELI}$ . The mean value of NNSE for multiple flood events is denoted as  $MNNSE$ . In synthetic cases, 'synthetic true values' serve as the benchmark for all evaluation metrics, while observed values are used in real-world cases. Additional information about these metrics can be found in Supplement 3.

**Special thanks to you for your good comments. Other revisions to the manuscript can be found in "Point-by-point response to Anonymous Reviewer #1" and "Point-by-point response to Anonymous Reviewer #2".**

### **Reference mentioned in the responses**

- Rakovec, O., Weerts, A. H., Sumihar, J., and Uijlenhoet, R.: Operational aspects of asynchronous filtering for flood forecasting, *Hydrol. Earth Syst. Sci.*, 19, 2911-2924, <https://doi.org/10.5194/hess-19-2911-2015>, 2015.
- Tao, J., Wu, D., Gourley, J., Zhang, S. Q., Crow, W., Peters-Lidard, C., & Barros, A. P.: Operational hydrological forecasting during the IPHEX-IOP campaign - Meet the challenge. *J. Hydrol.*, 541, 434-456, <https://doi.org/10.1016/j.jhydrol.2016.02.019>, 2016.
- Zhao, R.: The Xinanjiang model applied in China. *J. Hydrol.*, 135(1-4), 371-381. [https://doi.org/10.1016/0022-1694\(92\)90096-E](https://doi.org/10.1016/0022-1694(92)90096-E), 1992.
